# Supplementary figures and images for: Resection of Eloquent Located Brain Tumors by Mapping Only—A Feasibility Study
Source: MDPI journal article supplement (doi:10.3390/brainsci13101366), 2023-09-25

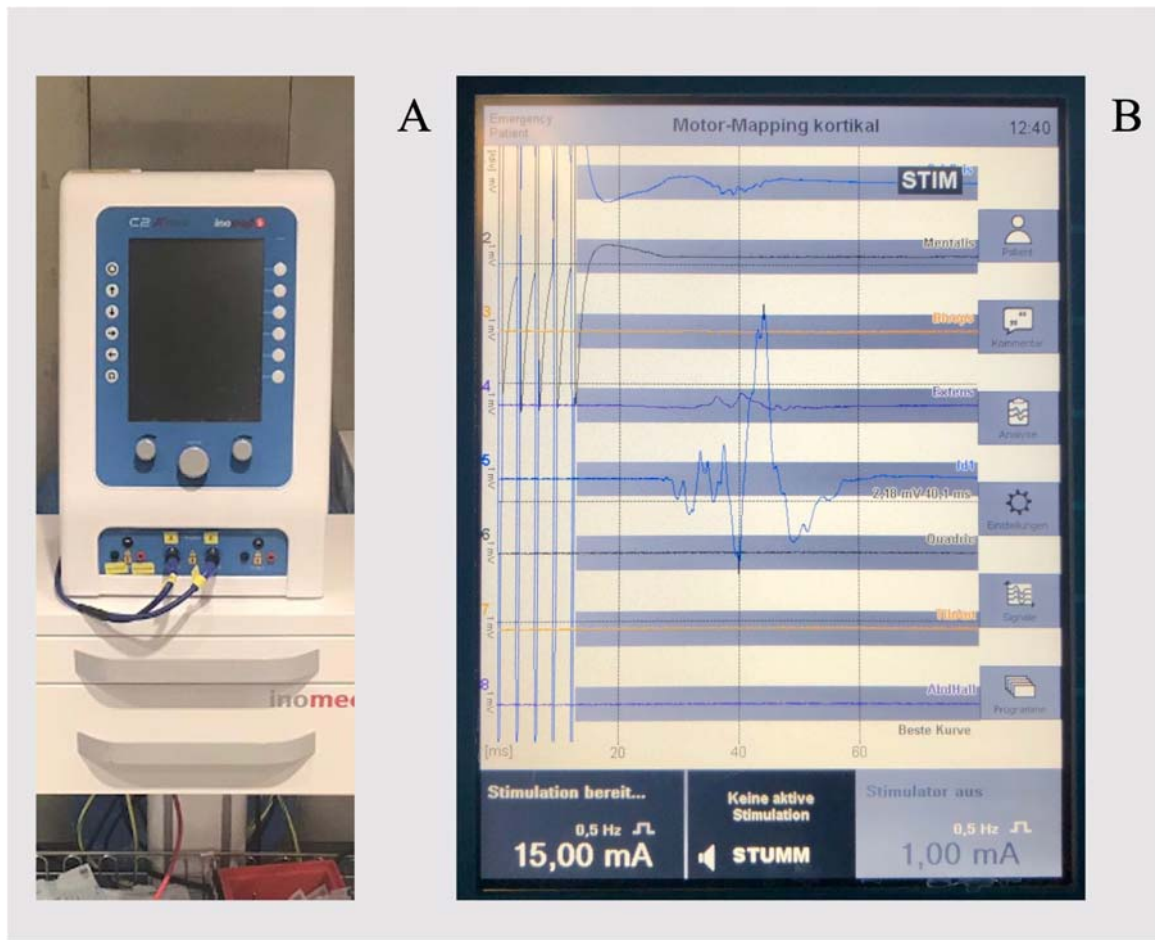

**Figure S1.** C2 Xtend device and screenshot of intraoperative display of monopolar stimulation.

Supplement: s1 [file s1]
